# Supplementary material
Source: publisher site journal article supplement (https://www.dovepress.com/article/529715)
Supplement: Supplementary file 1 [file 529715%20Figure%20S1.docx]

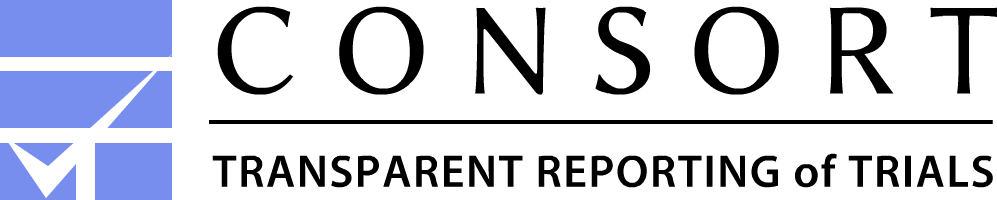


**CONSORT 2010 Flow Diagram**

Analysed (n=39)
 Excluded from analysis (give reasons) (n=0)

Analysed (n= 39)
 Excluded from analysis (give reasons) (n= 0)

## Analysis

## Enrollment

Allocated to intervention (n= 39)

 Received allocated intervention (n= 39)

 Did not receive allocated intervention (give reasons) (n= 0)

## Allocation

Allocated to intervention (n=39)

 Received allocated intervention (n= 39)

 Did not receive allocated intervention (give reasons) (n= 0)

Randomized (n=78)

Excluded (n= 8)

  Not meeting inclusion criteria (n= 2)

  Declined to participate (n= 2)

  Other reasons (n=4)

Assessed for eligibility (n= 86)
